# Supplementary material for: Onset of fights and mutual assessment in ant founding queens
Source: Oxford University Press journal article supplement (doi:10.1242/jeb.150375), 2016-01-01
Supplement: jeb150375supp.pdf [file jeb150375supp.pdf]

## SUPPLEMENTARY MATERIALS

**Table S1. Compounds in the cuticular extracts of queens.** VIP (Variable Importance in Projection) scores (1<sup>st</sup> and 2<sup>nd</sup> component) of each compound on each component of the discriminant analysis (PLS-DA). Compounds highlighted in bold were retained in the analysis (a VIP score >1 denotes a highly influential compound in the discrimination between lowly and highly fertile queens). KI: Kovat's index.

| Peak | Compound                                                  | KI   | VIP score   |             |
|------|-----------------------------------------------------------|------|-------------|-------------|
|      |                                                           |      | Comp.1      | Comp.2      |
| 1    | n-C <sub>27</sub>                                         | 2695 | <b>1.52</b> | <b>1.44</b> |
| 2    | 3-MeC <sub>27</sub>                                       | 2769 | <b>1.86</b> | <b>1.75</b> |
| 3    | 5,9-diMeC <sub>27</sub>                                   | 2777 | <b>1.45</b> | <b>1.4</b>  |
| 4    | n-C <sub>28</sub>                                         | 2794 | 0.04        | 0.36        |
| 5    | 5,9-diMeC <sub>28</sub>                                   | 2875 | <b>2.06</b> | <b>1.97</b> |
| 6    | n-C <sub>29</sub>                                         | 2895 | 0.32        | 0.55        |
| 7    | 7-/ 9-/ 11-/ 13- and 15-MeC <sub>29</sub>                 | 2926 | 0.12        | 0.15        |
| 8    | 11-MeC <sub>29</sub>                                      | 2946 | <b>1.41</b> | <b>1.33</b> |
| 9    | 7,11-/ 9,15- and 11,15-diMeC <sub>29</sub>                | 2959 | 0.12        | 0.48        |
| 10   | 7-MeC <sub>29</sub>                                       | 2964 | 0.21        | 0.2         |
| 11   | 3-MeC <sub>29</sub>                                       | 2969 | 0.75        | 0.73        |
| 12   | 5,15-diMeC <sub>29</sub>                                  | 2975 | 0.63        | 0.6         |
| 13   | x,15-diMeC <sub>29</sub>                                  | 2987 | 0.91        | 0.89        |
| 14   | n-C <sub>30</sub>                                         | 3002 | <b>1.11</b> | <b>1.05</b> |
| 15   | 12,14-diMeC <sub>30</sub>                                 | 3025 | 0.33        | 0.32        |
| 16   | 12,14-diMeC <sub>30</sub>                                 | 3029 | 0.54        | 0.65        |
| 17   | 10,14-diMeC <sub>30</sub>                                 | 3055 | 0.18        | 0.57        |
| 18   | C <sub>31:1</sub>                                         | 3074 | <b>1.47</b> | <b>1.41</b> |
| 19   | n-C <sub>31</sub>                                         | 3095 | <b>2.16</b> | <b>2.09</b> |
| 20   | 9-/ 11-/ 13- and 15-MeC <sub>31</sub>                     | 3127 | 0.45        | 0.61        |
| 21   | 9,x-diMeC <sub>31</sub>                                   | 3152 | 0.29        | 0.27        |
| 22   | 7,17-/ 9,15-/ 9,17-/ 11,15- and 13,17-diMeC <sub>31</sub> | 3160 | 0.72        | 0.85        |
| 23   | 7-MeC <sub>31</sub>                                       | 3164 | 0.1         | 0.32        |
| 24   | 3-MeC <sub>31</sub>                                       | 3171 | 0.9         | 0.96        |
| 25   | 5,13- and 5,17-diMeC <sub>31</sub>                        | 3176 | 0.59        | 0.56        |
| 26   | 7,13,17-triMeC <sub>31</sub>                              | 3189 | 0.7         | 0.75        |
| 27   | 3,9-/ 3,11-/ 3,13-/ 3,15- and 3,19-diMeC <sub>31</sub>    | 3200 | 0.47        | 0.62        |
| 28   | 10-/ 14- and 15-MeC <sub>32</sub>                         | 3224 | <b>1.11</b> | <b>1.17</b> |
| 29   | 4-MeC <sub>32</sub> and 10,14-diMeC <sub>32</sub>         | 3253 | <b>1.39</b> | <b>1.41</b> |
| 30   | 7-/ 9-/ 11-/ 13-/ 15-/ 17- and 19-MeC <sub>33</sub>       | 3326 | <b>1.43</b> | <b>1.42</b> |
| 31   | 11,15-/ 13,17- and 15,19-diMeC <sub>33</sub>              | 3352 | 0.65        | 0.64        |
| 32   | 9,15- and 11,17-diMeC <sub>33</sub>                       | 3357 | <b>2</b>    | <b>1.89</b> |
| 33   | 5,13- 5,17-diMeC <sub>33</sub>                            | 3373 | 0.04        | 0.18        |
| 34   | 2-MeC <sub>33</sub>                                       | 3386 | 0.78        | 0.74        |
| 35   | n-C <sub>34</sub>                                         | 3399 | 0.1         | 0.58        |
| 36   | 17-MeC <sub>34</sub>                                      | 3422 | 1.02        | 0.98        |
| 37   | 10-MeC <sub>34</sub>                                      | 3453 | 0.89        | 0.97        |
| 38   | 13-MeC <sub>35</sub>                                      | 3523 | 0.68        | 0.88        |
| 39   | 12-MeC <sub>35</sub>                                      | 3548 | 0.03        | 0.12        |
| 40   | 9-/ 11-MeC <sub>35</sub>                                  | 3555 | 0.88        | 0.88        |
| 41   | 13,x-diMeC <sub>35</sub>                                  | 3566 | 0.51        | 0.5         |
| 42   | 9-/ 11-MeC <sub>37</sub>                                  | 3749 | <b>1.05</b> | <b>1</b>    |

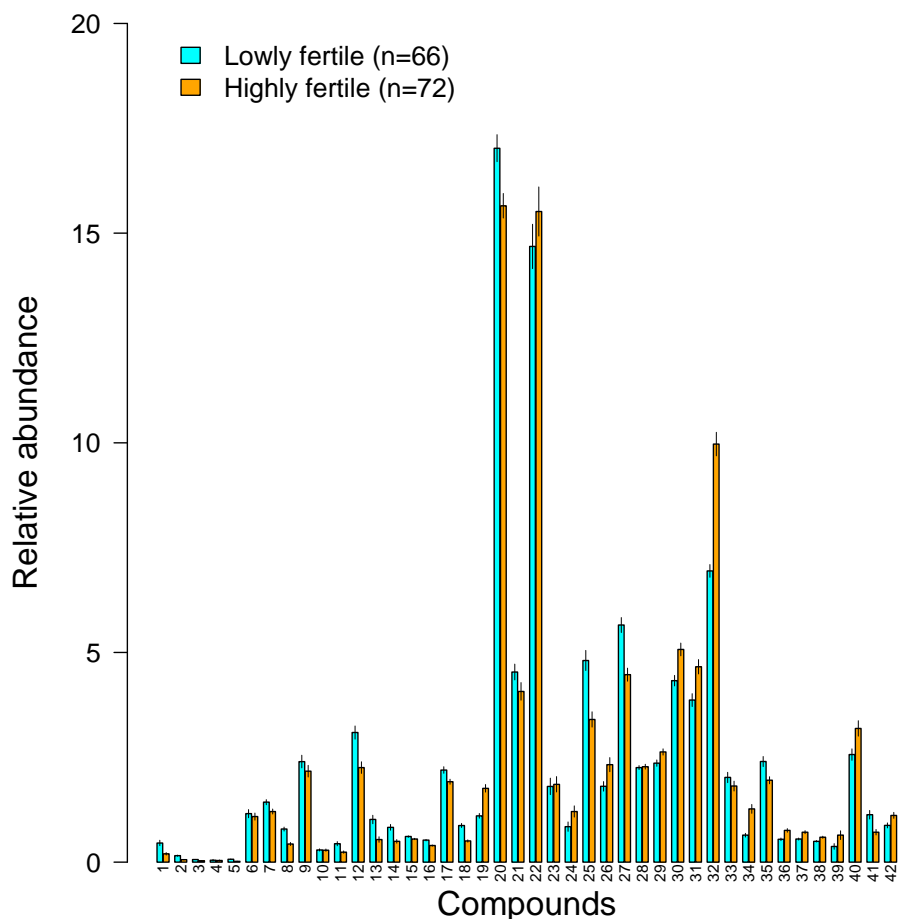

**Figure S1. Relative abundance (mean  $\pm$  SE) of hydrocarbons for lowly and highly fertile queens.** The identity of each compound is reported in Table S1.

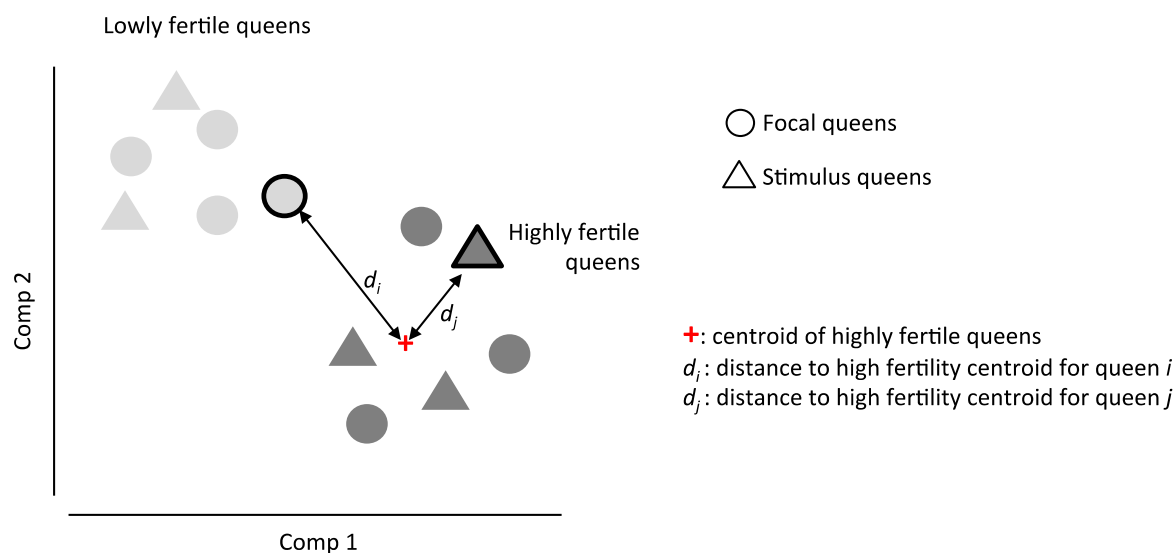

**Figure S2. Schematic explanation of how the distance of each queen to high fertility signature was determined.** The distance  $d_i$  is the distance of the focal queen  $i$  to the centroid of highly fertile queens and the distance  $d_j$  is the distance of the stimulus queen  $j$  to the centroid of highly fertile queens.
